# Supplementary material for: Epiphytic Orchid Diversity along an Altitudinal Gradient in Central Nepal
Source: MDPI journal article supplement (doi:10.3390/plants10071381), 2021-07-06
Supplement: s1 [file s1]

## Supplementary Materials

**Table S1.** List of epiphytic orchid species recorded in this study.

| Orchid species                                               | Abbreviations |
|--------------------------------------------------------------|---------------|
| <i>Agrostophyllum callosum</i> Rchb.f.                       | Agr cal       |
| <i>Aerides multiflora</i> Roxb.                              | Aer mul       |
| <i>Aerides odorata</i> Lour.                                 | Aer odo       |
| <i>Bulbophyllum affine</i> Lindl.                            | Bul aff       |
| <i>Bulbophyllum careyanum</i> (Hook.) Spreng.                | Bul care      |
| <i>Bulbophyllum cariniflorum</i> Rchb.                       | Bul cari      |
| <i>Bulbophyllum leopardinum</i> (Wall.) Lindl. ex Wall.      | Bul leo       |
| <i>Bulbophyllum purpureofusum</i> J.J.Verm.                  | Bul pur       |
| <i>Bulbophyllum reptans</i> (Lindl.) Lindl. ex Wall.         | Bul rep       |
| <i>Bulbophyllum</i> sp.                                      | Bul sp.       |
| <i>Coelogyne corymbosa</i> Lindl.                            | Coe cor       |
| <i>Coelogyne cristata</i> Lindl.                             | Coe cri       |
| <i>Coelogyne flaccida</i> Lindl.                             | Coe fla       |
| <i>Coelogyne fuscescens</i> Lindl.                           | Coe fus       |
| <i>Coelogyne nitida</i> (Wall ex. D. Don) Lindl.             | Coe nit       |
| <i>Coelogyne ovalis</i> Lindl.                               | Coe ova       |
| <i>Coelogyne prolifera</i> Lindl.                            | Coe pro       |
| <i>Cymbidium elegans</i> Lindl.                              | Cym ele       |
| <i>Cymbidium iridioides</i> D. Don                           | Cym iri       |
| <i>Epigeneium amplum</i> (Lindl.) Summerh.                   | Den amp       |
| <i>Dendrobium amoenum</i> Wall. ex Lindl.                    | Den amo       |
| <i>Dendrobium denudans</i> D. Don                            | Den den       |
| <i>Dendrobium eriiflorum</i> Griff.                          | Den eri       |
| <i>Dendrobium heterocarpum</i> Wall. ex Lindl.               | Den het       |
| <i>Dendrobium longicornu</i> Lindl.                          | Den lon       |
| <i>Dendrobium peguanum</i> Lindl.                            | Den peg       |
| <i>Eria spicata</i> (D. Don) Hand.-Mazz.                     | Eri con       |
| <i>Eria coronaria</i> (Lindl.) Rchb. f.                      | Eri cor       |
| <i>Gastrochilus acutifolius</i> (Lindl.) Kuntze              | Gas acu       |
| <i>Gastrochilus calceolaris</i> (Buch.-Ham. ex Sm.) D. Don   | Gas cal       |
| <i>Gastrochilus dasypogon</i> (Sm.) Kuntze                   | Gas dys       |
| <i>Gastrochilus obliquus</i> (Lindl.) Kuntze.                | Gas obl       |
| <i>Sunipia bicolor</i> Lindl.                                | Sun bic       |
| <i>Sunipia cirrhata</i> (Lindl.) P. F. Hunt                  | Sun cir       |
| <i>Oberonia caulescens</i> Lindl.                            | Obe cau       |
| <i>Otochilus fuscus</i> Lindl.                               | Oct fus       |
| <i>Panisea demissa</i> (D. Don) Pfitzer                      | Pan dem       |
| <i>Pleione humilis</i> (Sm.) D. Don                          | Ple hum       |
| <i>Pleione praecox</i> (Lindl.) D. Don                       | Ple par       |
| <i>Phalaenopsis taenialis</i> (Lindl.) Christenson & Pradhan | Pha tae       |

|                                        |         |
|----------------------------------------|---------|
| <i>Pholidota articulata</i> Lindl.     | Pho art |
| <i>Pholidota imbricata</i> Hook.       | Pho imb |
| <i>Rhynchostylis retusa</i> (L.) Blume | Rhy ret |
| <i>Vanda cristata</i> Wall. ex Lindl.  | Van cri |

**Table S2** List of host species recorded in this study.

| <b>Trees</b>                                                     | <b>Abbreviations</b> |
|------------------------------------------------------------------|----------------------|
| <i>Acanthopanax</i> sp.                                          | Aca sp.              |
| <i>Albizia chinensis</i> (Osbeck) Merr.                          | Alb chi              |
| <i>Alnus nepalensis</i> D. Don                                   | Aln nep              |
| <i>Berberis asiatica</i> Roxb. ex DC.                            | Ber asi              |
| <i>Betula alnoides</i> Buch.-Ham. ex D. Don                      | Bet aln              |
| <i>Betula alnoides</i> Buch.-Ham. ex D. Don                      | Bet aln              |
| <i>Castanopsis hystrix</i> Miq.                                  | Cas hys              |
| <i>Castanopsis indica</i> (Roxb.) Miq.                           | Cas ind              |
| <i>Castanopsis tribuloides</i> (Sm.) A. DC.                      | Cas tri              |
| <i>Choerospondias axillaris</i> (Roxb.) B. L. Burtt & A. W. Hill | Cho axi              |
| <i>Cornus capitata</i> Wall.                                     | Cor cap              |
| <i>Eriobotrya dubia</i> (Lindl.) Decne.                          | Eri dub              |
| <i>Eriobotrya japonica</i> (Thunb.) Lindl.                       | Eri jap              |
| <i>Eurya acuminata</i> DC.                                       | Eur acu              |
| <i>Jasminum humile</i> L.                                        | Jas hum              |
| <i>Ligustrum indicum</i> (Lour.) Merr.                           | Lig ind              |
| <i>Ligustrum</i> sp.                                             | Lig sp.              |
| <i>Lindera nacusua</i> (D. Don) Merr.                            | Lin nac              |
| <i>Lindera pulcherrima</i> (Nees) Benth. ex Hook. f.             | Lin pul              |
| <i>Lithocarpus elegans</i> (Blume) Hatus. ex Soepadmo            | Lit ele              |
| <i>Lyonia ovalifolia</i> (Wall.) Drude                           | Lyo ova              |
| <i>Meliosma dilleniifolia</i> (Wall. ex Wight & Arn.) Walp.      | Mel dil              |
| <i>Michelia</i> sp.                                              | Mic sp.              |
| <i>Myrica esculenta</i> Buch.-Ham. ex D. Don                     | Myr esc              |
| <i>Pinus roxburghii</i> Sarg.                                    | Pin rox              |
| <i>Pinus wallichiana</i> A. B. Jacks.                            | Pin wal              |
| <i>Prunus cerasoides</i> D. Don                                  | Pru cer              |
| <i>Pyrus pashia</i> Buch.-Ham. ex D. Don                         | Pyr pas              |
| <i>Quercus glauca</i> Thunb.                                     | Que gla              |
| <i>Quercus lamellosa</i> Sm.                                     | Que lam              |
| <i>Quercus lanata</i> Sm.                                        | Que lan              |
| <i>Quercus semecarpifolia</i> Sm.                                | Que sem              |
| <i>Rhododendron arboreum</i> Sm.                                 | Rho arb              |
| <i>Saurauia napaulensis</i> DC.                                  | Sau nap              |
| <i>Schima wallichii</i> (DC.) Korth.                             | Sch wal              |
| <i>Symplocos theifolia</i> D. Don                                | Sym the              |
| <i>Viburnum mullaha</i> Buch.-Ham. ex D. Don                     | Vib mul              |
| <i>Wikstroemia canescens</i> Meisn.                              | Wik can              |
| <i>Zizyphus incurva</i> Roxb.                                    | Ziz inc              |

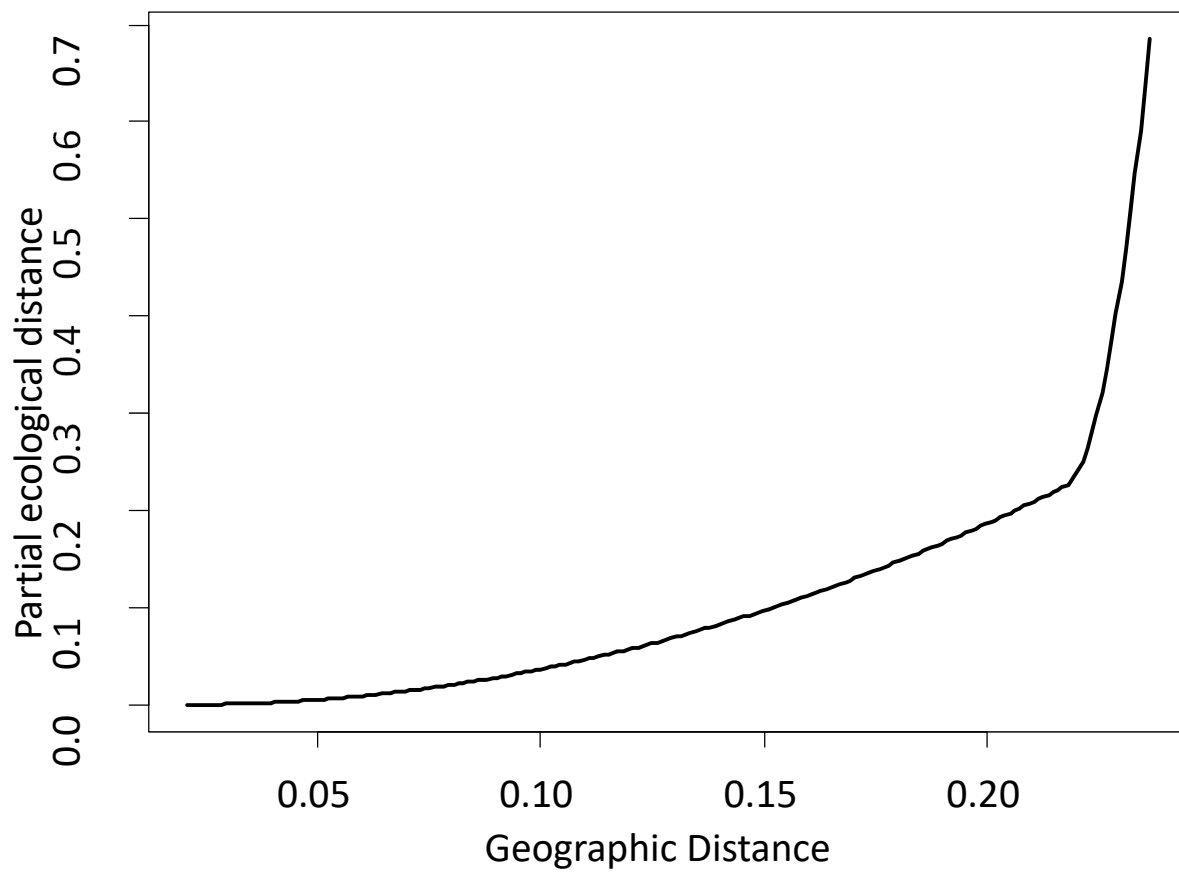

**Figure S1.** Generalized dissimilarity model-fitted I-spline (partial regression fit) of geographical distance and ecological distance.
